# Supplementary material for: Changes in nutrients and decay rate of Ginkgo biloba leaf litter exposed to elevated O3 concentration in urban area
Source: PeerJ. 2018 Mar 5;6:e4453. doi: 10.7717/peerj.4453 (PMC5842764; doi:10.7717/peerj.4453)
Supplement: Data S2 [file peerj-06-4453-s002.xls]

## Sheet: O3 concentrations
2013		AA-Control	EO-120ppb	AA	EO
May	Times (date-month-year)	[O3]-ppm	[O3]-ppm	[O3]-ppb	[O3]-ppb
	19-5-2013	0.0284796	0.1055	28.4796	105.5
	20	0.0304796	0.0994337	30.4796	99.4337
	21	0.0380612	0.116163	38.0612	116.163
	22	0.0461167	0.124917	46.1167	124.917
	23	0.0407375	0.11808	40.7375	118.08
	24	0.0343208	0.121325	34.3208	121.325
	25	0.0367875	0.121437	36.7875	121.437
	26-5-2013	0.0388	0.120779	38.8	120.779
	27	0.0377875	0.123112	37.7875	123.112
	28	0.0312667	0.125096	31.2667	125.096
	29	0.0536958	0.123151	53.6958	123.151
	30	0.0236625	0.0988792	23.6625	98.8792
	31	0.0460375	0.113708	46.0375	113.708
June	1	0.033888	0.121573	33.888	121.573
	2-6-2013	0.0316224	0.120523	31.6224	120.523
	3	0.0324689	0.119444	32.4689	119.444
	4	0.0299461	0.12449	29.9461	124.49
	5	0.0475934	0.12373	47.5934	123.73
	6	0.0377178	0.123133	37.7178	123.133
	7	0.0314647	0.120564	31.4647	120.564
	8	0.0384481	0.124954	38.4481	124.954
	9-6-2013	0.0145519	0.12239	14.5519	122.39
	10	0.0388	0.117622	38.8	117.622
	11	0.0412448	0.12544	41.2448	125.44
	12	0.0312333	0.111567	31.2333	111.567
	13	0.0215851	0.120361	21.5851	120.361
	14	0.0191743	0.117411	19.1743	117.411
	15	0.0514066	0.124689	51.4066	124.689
	16-6-2013	0.0467344	0.115535	46.7344	115.535
	17	0.0322573	0.124938	32.2573	124.938
	18	0.027834	0.116743	27.834	116.743
	19	0.0311328	0.126012	31.1328	126.012
	20	0.0358465	0.119689	35.8465	119.689
	21	0.0330705	0.121809	33.0705	121.809
	22	0.0465726	0.125759	46.5726	125.759
	23-6-2013	0.0366971	0.117772	36.6971	117.772
	24	0.0266971	0.105	26.6971	105
	25	0.0437178	0.1238	43.7178	123.8
	26	0.0445187	0.1123	44.5187	112.3
	27	0.0419461	0.12551	41.9461	125.51
	28	0.0440124	0.12446	44.0124	124.46
	29	0.036888	0.124398	36.888	124.398
	30-6-2013	0.0568091	0.1231	56.8091	123.1
July	1	0.0433527	0.125	43.3527	125
	2	0.0588	0.118382	58.8	118.382
	3	0.0344398	0.115303	34.4398	115.303
	4	0.0537178	0.122378	53.7178	122.378
	5	0.0245187	0.0952656	24.5187	95.2656
	6	0.0519461	0.124116	51.9461	124.116
	7-7-2013	0.0440124	0.102241	44.0124	102.241
	8	0.046888	0.124394	46.888	124.394
	9	0.0618091	0.116012	61.8091	116.012
	10	0.0658548	0.11768	65.8548	117.68
	11	0.0524191	0.119062	52.4191	119.062
	12	0.0414892	0.114659	41.4892	114.659
	13	0.0558216	0.0975975	55.8216	97.5975
	14-7-2013	0.0590534	0.119486	59.0534	119.486
	15	0.0576349	0.125928	57.6349	125.928
	16	0.0764967	0.111883	76.4967	111.883
	17	0.0431162	0.119228	43.1162	119.228
	18	0.0435477	0.118668	43.5477	118.668
	19	0.0498465	0.118369	49.8465	118.369
	20	0.0253817	0.103373	25.3817	103.373
	21-7-2013	0.0365021	0.117859	36.5021	117.859
	22	0.0488	0.115021	48.8	115.021
	23	0.0567718	0.114332	56.7718	114.332
	24	0.0422573	0.104112	42.2573	104.112
	25	0.0437759	0.108199	43.7759	108.199
	26	0.0528672	0.117137	52.8672	117.137
	27	0.0435726	0.111954	43.5726	111.954
	28-7-2013	0.0223154	0.122116	22.3154	122.116
	29	0.0532116	0.124137	53.2116	124.137
	30	0.041805	0.114402	41.805	114.402
	31	0.0488	0.115008	48.8	115.008
August	1	0.0568133	0.101734	56.8133	101.734
	2	0.0641909	0.116593	64.1909	116.593
	3	0.0388	0.115166	38.8	115.166
	4-8-2013	0.0622573	0.112867	62.2573	112.867
	5	0.0522573	0.124407	52.2573	124.407
	6	0.05639	0.122755	56.39	122.755
	7	0.0637303	0.122963	63.7303	122.963
	8	0.0422573	0.123224	42.2573	123.224
	9	0.0551452	0.116826	55.1452	116.826
	10	0.0575851	0.124245	57.5851	124.245
	11-8-2013	0.0526141	0.118407	52.6141	118.407
	12	0.0388	0.110697	38.8	110.697
	13	0.0508631	0.121129	50.8631	121.129
	14	0.0461494	0.125307	46.1494	125.307
	15	0.0421577	0.124718	42.1577	124.718
	16	0.0385394	0.121519	38.5394	121.519
	17	0.0385145	0.121826	38.5145	121.826
	18-8-2013	0.0388	0.124502	38.8	124.502
	19	0.0522573	0.101697	52.2573	101.697
	20	0.0454357	0.125817	45.4357	125.817
	21	0.0420996	0.119647	42.0996	119.647
	22	0.0453112	0.125241	45.3112	125.241
	23	0.0424772	0.124017	42.4772	124.017
	24	0.044722	0.117124	44.722	117.124
	25-8-2013	0.0322573	0.123465	32.2573	123.465
	26	0.0322573	0.123093	32.2573	123.093
	27	0.0250581	0.11756	25.0581	117.56
	28	0.0369834	0.126002	36.9834	126.002
	29	0.0388	0.123461	38.8	123.461
	30	0.0369212	0.117593	36.9212	117.593
	31	0.0388	0.123519	38.8	123.519
September	1-9-2013	0.0335062	0.115826	33.5062	115.826
	2	0.0319087	0.121427	31.9087	121.427
	3	0.0328	0.122826	32.8	122.826
	4	0.0429502	0.119228	42.9502	119.228
	5	0.0361618	0.125137	36.1618	125.137
	6	0.0322573	0.113693	32.2573	113.693
	7	0.0347759	0.114627	34.7759	114.627
	8-9-2013	0.0342365	0.125461	34.2365	125.461
	9	0.0282614	0.125207	28.2614	125.207
	10	0.0326432	0.122473	32.6432	122.473
	11	0.0128423	0.12049	12.8423	120.49
	12	0.0322573	0.125967	32.2573	125.967
	13	0.0388	0.123751	38.8	123.751
	14	0.0306141	0.123295	30.6141	123.295
	15-9-2013	0.0322863	0.124087	32.2863	124.087
	16	0.0322573	0.121593	32.2573	121.593
	17	0.0356515	0.125635	35.6515	125.635
	18	0.0378631	0.126734	37.8631	126.734
	19	0.0237386	0.124415	23.7386	124.415
	20	0.035112	0.118751	35.112	118.751
	21	0.0344896	0.114822	34.4896	114.822
	22-9-2013	0.0208299	0.124104	20.8299	124.104
	23	0.0310747	0.122494	31.0747	122.494
	24	0.0252988	0.119432	25.2988	119.432
	25	0.0231535	0.125095	23.1535	125.095
	26	0.030361	0.121029	30.361	121.029
	27	0.0170498	0.125784	17.0498	125.784
	28	0.0322573	0.1258	32.2573	125.8
	29-9-2013	0.0292407	0.1223	29.2407	122.3
	30	0.0148589	0.1245	14.8589	124.5
October	1	0.0351867	0.113896	35.1867	113.896
	2	0.027112	0.122324	27.112	122.324
	3	0.027112	0.124124	27.112	124.124
	4	0.0388091	0.120631	38.8091	120.631
	5	0.0340913	0.125191	34.0913	125.191
	6-10-2013	0.0307967	0.124581	30.7967	124.581
	7	0.0245809	0.125021	24.5809	125.021
	8	0.0322573	0.122411	32.2573	122.411
	9	0.0292407	0.124349	29.2407	124.349
	10	0.0295602	0.124012	29.5602	124.012
	11	0.0258797	0.125149	25.8797	125.149
	12	0.0229004	0.124929	22.9004	124.929
	13-10-2013	0.0312531	0.123896	31.2531	123.896
	14	0.0256017	0.124946	25.6017	124.946
	15	0.0288174	0.12478	28.8174	124.78
	16	0.0261826	0.114828	26.1826	114.828
	17	0.0189668	0.124009	18.9668	124.009
	18	0.0200996	0.114689	20.0996	114.689
	19	0.0163651	0.105274	16.3651	105.274
	20-10-2013	0.0188714	0.121539	18.8714	121.539
				38.1639	119.505
